# Supplementary material
Source: PubMed Central journal article supplement (PMC9154023)

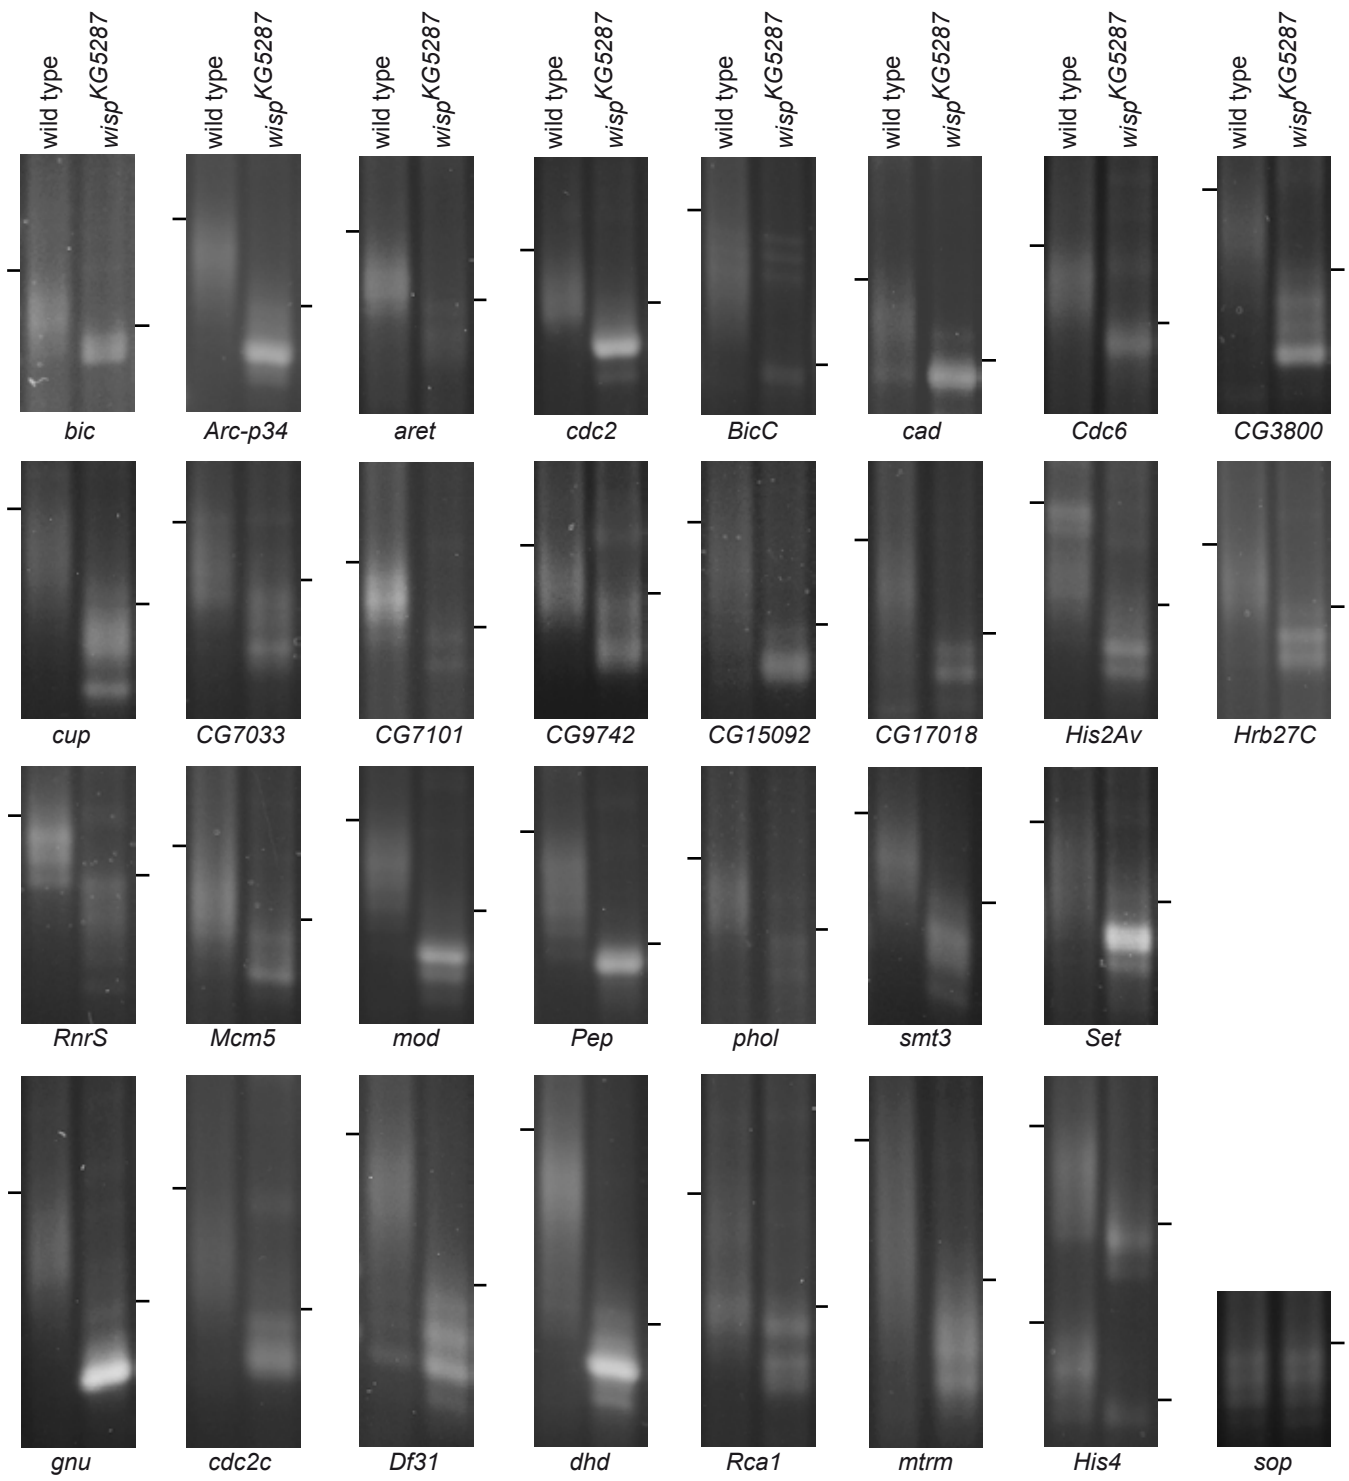

Supplementary Figure 1

Supplement: NIHMS1810300-supplement-Supplementary_Figure_1.pdf [file NIHMS1810300-supplement-Supplementary_Figure_1.pdf]

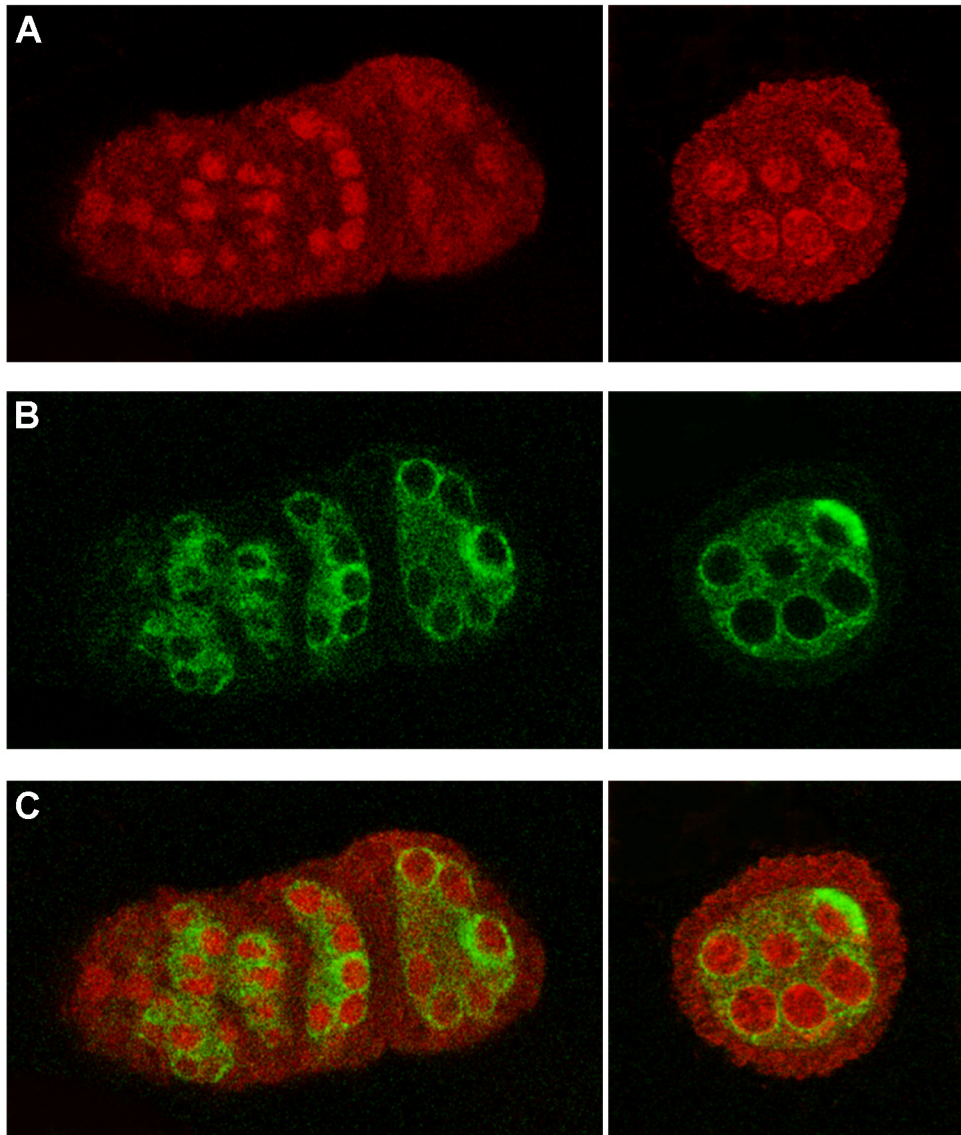

Supplementary Figure 2

Supplement: NIHMS1810300-supplement-Supplementary_Figure_2.pdf [file NIHMS1810300-supplement-Supplementary_Figure_2.pdf]

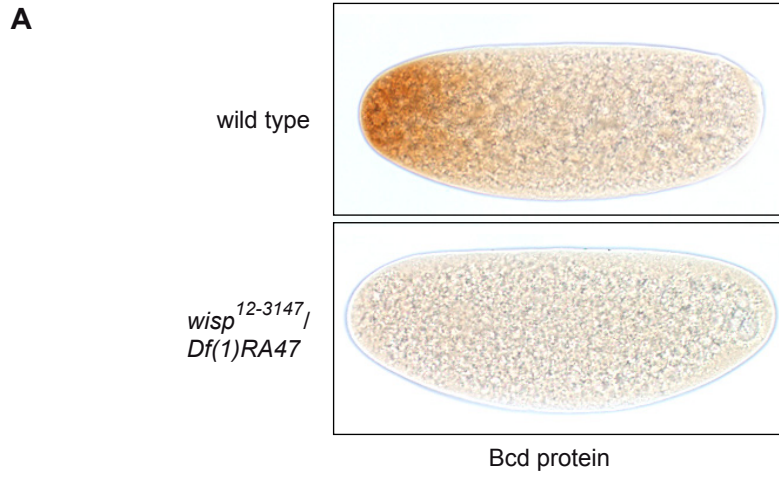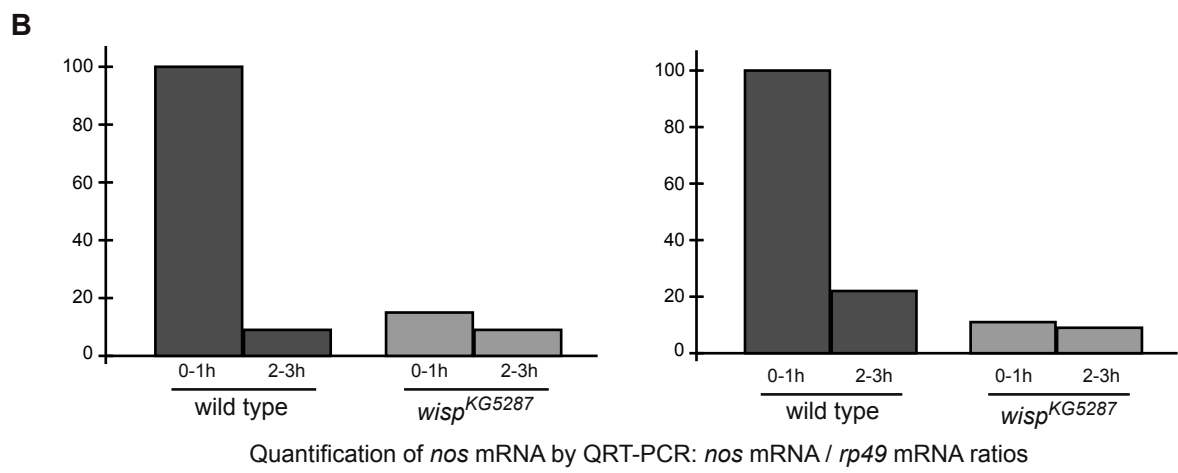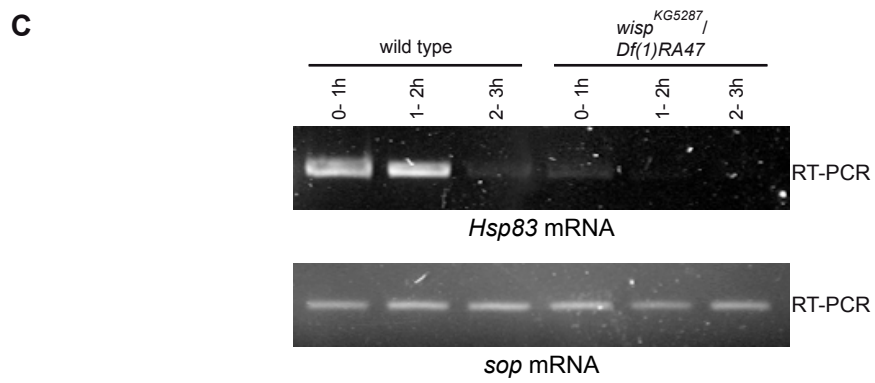

Supplementary Figure 3

Supplement: NIHMS1810300-supplement-Supplementary_Figure_3.pdf [file NIHMS1810300-supplement-Supplementary_Figure_3.pdf]
